# Supplementary figures and images for: Development and Up-Scaling of Electrochemical Production and Mild Thermal Reduction of Graphene Oxide
Source: MDPI journal article supplement (doi:10.3390/ma15134639), 2022-07-01

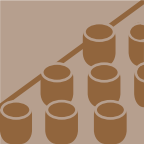

*materials*

Supplement: s1 [file s1]

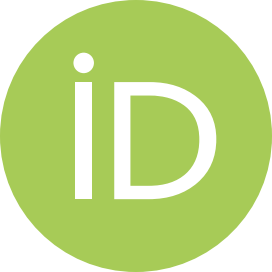

Supplement: s1 [file s1]

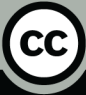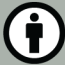

BY

Supplement: s1 [file s1]
